# Supplementary material
Source: Springer Nature journal article supplement (https://www.springermedizin.de/resource/supplementary/12891_2010_843_MOESM3_ESM.pdf/9507150)

**A**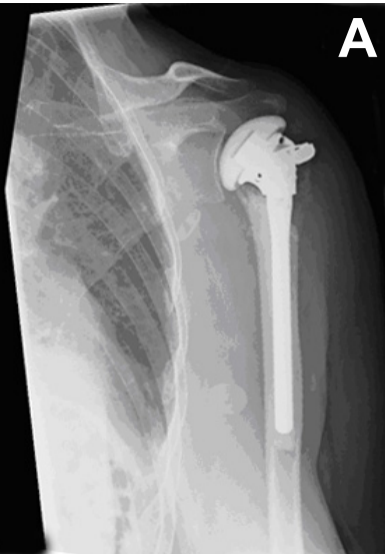**B**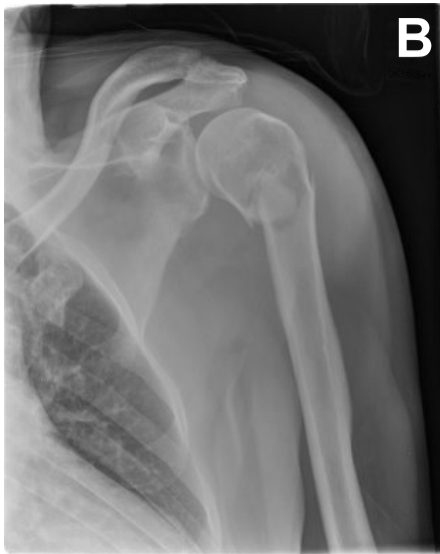

Supplement: MOESM3 [file 9507150]
